# Supplementary material
Source: publisher figshare collection journal article supplement (https://acs.figshare.com/ndownloader/files/9443191)
Supplement: Supplementary file 1 [file 9443191]

# Supporting Information

## Cation-Induced Strategy towards an Hourglass-Shaped $\text{Cu}_6\text{I}_7^-$ Cluster and its Color-Tunable Luminescence

Muxin Yu,<sup>†,‡</sup> Lian Chen,<sup>\*,†</sup> Feilong Jiang,<sup>†</sup> Kang Zhou,<sup>†</sup> Caiping Liu,<sup>†</sup> Cai Sun,<sup>†,‡</sup> Xingjun Li,<sup>†</sup> Yan Yang,<sup>†,‡</sup> Maochun Hong<sup>\*,†</sup>

<sup>†</sup>State Key Laboratory of Structure Chemistry, Fujian Institute of Research on the Structure of Matter, Chinese Academy of Sciences, Fuzhou, China, 350002.

<sup>‡</sup>University of the Chinese Academy of Sciences, Beijing, China, 100049.

\*Address correspondence to E-mail: cl@ffirms.ac.cn; hmc@ffirms.ac.cn

## Contents

|                                                                                                                                                                                                        |    |
|--------------------------------------------------------------------------------------------------------------------------------------------------------------------------------------------------------|----|
| <b>Materials and methods</b> .....                                                                                                                                                                     | 4  |
| Synthesis of $\{\text{Li}(\text{H}_2\text{O})(\text{EtOH})_3[\text{Cu}_6\text{I}_7(\text{tpa})_2]\}_n$ ( <b>1-Li</b> ) .....                                                                           | 4  |
| Synthesis of $\{\text{Na}(\text{H}_2\text{O})(\text{EtOH})_3[\text{Cu}_6\text{I}_7(\text{tpa})_2]\}_n$ ( <b>1-Na</b> ) .....                                                                           | 5  |
| Synthesis of $\{\text{NH}_4(\text{H}_2\text{O})(\text{EtOH})_3[\text{Cu}_6\text{I}_7(\text{tpa})_2]\}_n$ ( <b>1-NH<sub>4</sub></b> ) .....                                                             | 5  |
| Synthesis of $\{\text{K}(\text{H}_2\text{O})_2(\text{MeOH})_2[\text{Cu}_6\text{I}_7(\text{tpa})_2] \cdot \text{MeCN}\}_n$ ( <b>1-K</b> ) .....                                                         | 5  |
| Synthesis of $\{[\text{N}(\text{Et})_4][\text{Cu}_6\text{I}_7(\text{tpa})_2]\}_n$ ( <b>1-TEA</b> ) .....                                                                                               | 5  |
| Synthesis of $\{[\text{N}(\text{Pr})_4][\text{Cu}_6\text{I}_7(\text{tpa})_2]\}_n$ ( <b>1-TPA</b> ) .....                                                                                               | 6  |
| Synthesis of $[\text{Cu}_2\text{I}_2(\text{tpa})_2]_n$ ( <b>2</b> ) .....                                                                                                                              | 6  |
| <b>X-ray crystallography</b> .....                                                                                                                                                                     | 6  |
| <b>Structure and properties of compound 2</b> .....                                                                                                                                                    | 7  |
| <b>Figure S1.</b> The structure presentation of <b>2</b> : (a) asymmetric unit; (b) 1D chain; (c) packing structure viewed along <i>a</i> axis; (d) packing structure viewed along <i>b</i> axis. .... | 7  |
| <b>Figure S2.</b> PXRD patterns of the compound <b>2</b> .....                                                                                                                                         | 8  |
| <b>Figure S3.</b> The photoluminescence spectra (left), powder sample under 365 nm UV light (insert) and CIE-1931 chromaticity diagram (right) of the compound <b>2</b> . ....                         | 8  |
| <b>Figure S4.</b> TG curves of compound <b>2</b> . ....                                                                                                                                                | 8  |
| <b>Computational Descriptions</b> .....                                                                                                                                                                | 9  |
| <b>LEDs fabrication and performance measurement</b> .....                                                                                                                                              | 9  |
| <b>Figure S5.</b> PXRD patterns of the compounds <b>1-Li</b> , <b>1-Na</b> , <b>1-NH<sub>4</sub></b> , <b>1-K</b> , <b>1-TEA</b> , and <b>1-TPA</b> . ....                                             | 10 |
| <b>Figure S6.</b> Coordination environment of the Cu(I) in the $\text{Cu}_6\text{I}_7^-$ cluster. ....                                                                                                 | 10 |

|                                                                                                                                                                                                                                                                                                         |    |
|---------------------------------------------------------------------------------------------------------------------------------------------------------------------------------------------------------------------------------------------------------------------------------------------------------|----|
| <b>Figure S7.</b> (a) Real structure model of the complexes with alkali metal cations ( <b>1-K</b> as a representative). (b) Real structure model of the complexes with ammonium cations ( <b>1-NH<sub>4</sub></b> as a representative).....                                                            | 10 |
| <b>Figure S8.</b> (a) Illustration of interlamellar structure in the complexes with alkali metal cations ( <b>1-K</b> as a representative). (b) Illustration of interlamellar structure in the complexes with ammonium cations ( <b>1-NH<sub>4</sub></b> as a representative). .....                    | 11 |
| <b>Figure S9.</b> TG curves of the six compounds. Inner: the amplification of <b>1-K</b> and <b>1-TEA</b> curves.....                                                                                                                                                                                   | 11 |
| <b>Figure S10.</b> FT-IR spectrum of the ligand (tpa) with labeled main peaks. ....                                                                                                                                                                                                                     | 11 |
| <b>Figure S11.</b> FT-IR spectra of the compounds <b>1-Li</b> , <b>1-Na</b> , and <b>1-K</b> with label main peaks. ....                                                                                                                                                                                | 12 |
| <b>Figure S12.</b> FT-IR spectra of the compounds <b>1-NH<sub>4</sub></b> , <b>1-TEA</b> , and <b>1-TPA</b> with labeled main peaks. ....                                                                                                                                                               | 12 |
| <b>Figure S13.</b> FT-IR spectrum of the compound <b>2</b> with labeled main peaks. ....                                                                                                                                                                                                                | 13 |
| <b>Figure S14.</b> The excitation (black) and emission (red) spectra of the ligand (tpa). ....                                                                                                                                                                                                          | 13 |
| <b>Figure S15.</b> The photoluminescence spectra (left), powder sample under 365 nm UV light (insert) and CIE-1931 chromaticity diagram (right) of the compound <b>1-TPA</b> . ....                                                                                                                     | 14 |
| <b>Figure S16.</b> Photoluminescence image of the six compounds dispersing in EtOH (upper) and cyclohexane (nether) under the 365 nm UV light.....                                                                                                                                                      | 14 |
| <b>Figure S17.</b> The emission spectra of the six compounds dispersing in EtOH (left) and cyclohexane (right). ....                                                                                                                                                                                    | 14 |
| <b>Figure S18.</b> Calculated DOS for <b>1-Li</b> : total and partial DOS (left); Cu partial DOS (right).....                                                                                                                                                                                           | 15 |
| <b>Figure S19.</b> Calculated DOS for <b>1-Na</b> : total and partial DOS (left); Cu partial DOS (right).....                                                                                                                                                                                           | 15 |
| <b>Figure S20.</b> Calculated DOS for <b>1-NH<sub>4</sub></b> : total and partial DOS (left); Cu partial DOS (right). ....                                                                                                                                                                              | 15 |
| <b>Figure S21.</b> Calculated DOS for <b>1-K</b> : total and partial DOS (left); Cu partial DOS (right). ....                                                                                                                                                                                           | 16 |
| <b>Figure S22.</b> Calculated DOS for <b>1-TEA</b> : total and partial DOS (left); Cu partial DOS (right). ....                                                                                                                                                                                         | 16 |
| <b>Figure S23.</b> Luminescence spectra of <b>1-K</b> excited at 375 nm at low temperature. ....                                                                                                                                                                                                        | 16 |
| <b>Scheme S1.</b> A schematic representation of the relationship between the Cu...Cu interactions and the splittings of the frontier metal orbitals (3d → 4s as a representative). ....                                                                                                                 | 17 |
| <b>Scheme S2.</b> Relationship of the Cu-Cu distance (left, black) and the emission wavelength (right, blue) with the layer distance of the five compounds. The linear fits show Equations $y = -0.142x + 0.417$ , $R^2 = 0.0947$ (left, black) and $y = 762x - 206$ , $R^2 = 0.983$ (right, blue)..... | 17 |
| <b>Figure S24.</b> TD-PXRD patterns of the compounds <b>1-Li</b> , <b>1-Na</b> , <b>1-NH<sub>4</sub></b> , <b>1-K</b> , <b>1-TEA</b> , and <b>1-TPA</b> ....                                                                                                                                            | 18 |
| <b>Figure S25.</b> PXRD patterns of <b>1-Li</b> at 300 °C (left) in accordance with CuI structure (JCPDS: No. 76-0210) and at 500 °C in accordance with CuO structure (JCPDS: No. 44-0706) (right).....                                                                                                 | 18 |
| <b>Figure S26.</b> PL intensity of <b>1-TEA</b> after exposed to open air for six months (red) and freshly prepared (black). ....                                                                                                                                                                       | 19 |
| <b>Figure S27.</b> PXRD patterns of the five compounds after heating at 120 °C for 48 h. ....                                                                                                                                                                                                           | 19 |

|                                                                                                                                                                                                                                                                                                                                                                                                                                                   |    |
|---------------------------------------------------------------------------------------------------------------------------------------------------------------------------------------------------------------------------------------------------------------------------------------------------------------------------------------------------------------------------------------------------------------------------------------------------|----|
| <b>Figure S28.</b> PXRD patterns of <b>1-TEA</b> after immersing in pH 2-14 buffer solutions for 24 h. ....                                                                                                                                                                                                                                                                                                                                       | 19 |
| <b>Figure S29.</b> PXRD patterns of <b>1-TEA</b> after soaking in water (H <sub>2</sub> O), methanol (MeOH), ethanol (EtOH), dichloromethane (DCM), diethyl ether (DEE), tetrachloromethane (CCl <sub>4</sub> ), cyclohexane (CYH) and hexane (Hex) solvents for 35 days. ....                                                                                                                                                                    | 20 |
| <b>Figure S30.</b> PXRD patterns of <b>1-TEA</b> after ball milling at 30 Hz for 30 min. ....                                                                                                                                                                                                                                                                                                                                                     | 20 |
| <b>Figure S31.</b> PXRD patterns of <b>1-TEA</b> after exposed to open air for six months. ....                                                                                                                                                                                                                                                                                                                                                   | 20 |
| <b>Figure S32.</b> (a) EL spectra of chip, <b>BP</b> (BAM: Eu <sup>2+</sup> ), <b>YP (1-TEA)</b> and the <b>3</b> LEDs. Inset: lighted LED of <b>3</b> . (b) EL spectra of <b>1</b> , <b>2</b> , <b>4</b> and <b>5</b> LEDs. Current density-voltage (I-V) curves (c), brightness-voltage (B-V) curves (d), plots of current efficiency vs current density (e) and plots of external quantum efficiency vs current density (f) for the LEDs. .... | 21 |
| <b>Table S1.</b> Important photoelectric parameters for LEDs <b>1-5</b> . ....                                                                                                                                                                                                                                                                                                                                                                    | 22 |
| <b>Table S2.</b> Crystal data and refinement results for <b>1-Li</b> , <b>1-Na</b> , <b>1-NH<sub>4</sub></b> , <b>1-K</b> , <b>1-TEA</b> , and <b>2</b> . ....                                                                                                                                                                                                                                                                                    | 23 |
| <b>Table S3.</b> Selected bond lengths (Å) and bond angles (°) for <b>1-Li</b> , <b>1-Na</b> , <b>1-NH<sub>4</sub></b> , <b>1-K</b> , and <b>1-TEA</b> . ....                                                                                                                                                                                                                                                                                     | 24 |
| <b>Table S4.</b> Selected bond lengths (Å) and bond angles (°) for compound <b>2</b> . ....                                                                                                                                                                                                                                                                                                                                                       | 25 |
| References:.....                                                                                                                                                                                                                                                                                                                                                                                                                                  | 27 |

## Materials and methods

All chemicals and solvents used were purchased from commercial sources and used without further purification. The ligand tppa (tppa = N,N',N''-tris(3-pyridinyl)phosphoric triamide) was prepared according to the procedures outlined in the literature.<sup>1</sup> The Elemental analyses for C, H, and N were carried out on a Vario EL III elemental analyzer, and inductively coupled plasma (ICP) spectroscopy was performed on an Ultima2 Inductively Coupled Plasma OES spectrometer. The powder X-ray diffraction (PXRD) patterns were collected by a RICA KU MiniFlex 600 diffractometer with Cu K $\alpha$  radiation at room temperature with a step size of 0.01° in 2 $\theta$  and a speed of 2°/min. The PXRD simulated pattern is based on single-crystal X-ray diffraction data using the Mercury Powder Pattern Calculate program.<sup>2</sup> Temperature-dependent X-ray diffraction experiments were performed on an Ultima-IV X-ray diffractometer with a step size of 0.01° in 2 $\theta$ . Thermogravimetric analyses (TGA) were performed on a Netzsch STA 449C instrument from room temperature to 800 °C with a heating rate of 10 °C·min<sup>-1</sup> under flowing nitrogen atmosphere. The IR spectra in the 400-4000 cm<sup>-1</sup> region were collected with KBr pellets on a PerkinElmer Spectrum One FT-IR spectrometer. Photoluminescence spectra were investigated on a Horiba Jobin-Yvon Fluorolog-3 spectrophotometer analyzer and the overall fluorescence quantum yields were obtained on a calibrated integrating sphere at room temperature on Edinburgh Instruments FLS920 spectrofluorometer. Ball-milling experiment was carried on the Retsch MM400 at 30 Hz for 30 minutes.

### Synthesis of {Li(H<sub>2</sub>O)(EtOH)<sub>3</sub>[Cu<sub>6</sub>I<sub>7</sub>(tppa)<sub>2</sub>]}<sub>n</sub> (1-Li)

CuI (0.019 g, 0.1 mmol) and tppa (0.010 g, 0.03 mmol) were dissolved in 2 mL MeCN and 4 mL EtOH respectively, and then they were mixed on the addition of 0.8 mL LiI saturated aqueous solution. After filtration and evaporation under ambient conditions for 5 days, light yellow crystals were obtained in 35.0% yield based on the tppa ligand. Anal. Calcd (%) for C<sub>36</sub>H<sub>50</sub>N<sub>12</sub>O<sub>6</sub>P<sub>2</sub>LiCu<sub>6</sub>I<sub>7</sub> (Mr = 2085.36): C, 20.73; H, 2.42; N, 8.06; Li, 0.33; Cu, 18.28. Found (%): C, 21.09; H, 2.30; N, 8.20; Li, 0.32; Cu, 18.44. IR (KBr, main absorption bands): 3531( $\nu$ (O-H)), 3441( $\nu$ (-NH)), 3326( $\nu$ (O-H)), 3174 ( $\nu$ (P=O)), 2972( $\nu$ (-CH<sub>3</sub>)), 2843( $\nu$ (-CH<sub>2</sub>)), 1580( $\nu$ (C=C)), 1467( $\nu$ (C=C)), 1272( $\nu$ (C-N)), 1193( $\nu$ (C-N)), 1050( $\nu$ (C-N)), 954( $\delta$ (Ar-H)), 789( $\delta$ (Ar-H)) and 693( $\delta$ (Ar-H)) cm<sup>-1</sup>.

### Synthesis of $\{\text{Na}(\text{H}_2\text{O})(\text{EtOH})_3[\text{Cu}_6\text{I}_7(\text{tppa})_2]\}_n$ (**1-Na**)

The synthetic procedure was similar to that used in **1-Li** except LiI saturated aqueous solution was changed to NaI saturated aqueous solution. After filtration and evaporation, light yellow crystals were obtained in 53.4% yield based on the tppa ligand. Anal. Calcd (%) for  $\text{C}_{36}\text{H}_{50}\text{N}_{12}\text{O}_6\text{P}_2\text{NaCu}_6\text{I}_7$  (Mr = 2101.40): C, 20.58; H, 2.40; N, 8.00; Na, 1.09; Cu, 18.14. Found (%): C, 20.92; H, 2.29; N, 8.26; Na, 1.11; Cu, 18.35. IR (KBr, main absorption bands): 3531( $\nu(\text{O-H})$ ), 3441( $\nu(\text{-NH})$ ), 3326( $\nu(\text{O-H})$ ), 3180 ( $\nu(\text{P=O})$ ), 2972( $\nu(\text{-CH}_3)$ ), 2843( $\nu(\text{-CH}_2)$ ), 1580( $\nu(\text{C=C})$ ), 1467( $\nu(\text{C=C})$ ), 1272( $\nu(\text{C-N})$ ), 1193( $\nu(\text{C-N})$ ), 1050( $\nu(\text{C-N})$ ), 954( $\delta(\text{Ar-H})$ ), 789( $\delta(\text{Ar-H})$ ) and 695( $\delta(\text{Ar-H})$ )  $\text{cm}^{-1}$ .

### Synthesis of $\{\text{NH}_4(\text{H}_2\text{O})(\text{EtOH})_3[\text{Cu}_6\text{I}_7(\text{tppa})_2]\}_n$ (**1-NH<sub>4</sub>**)

$\text{NH}_4\text{I}$  saturated aqueous solution was substituted for LiI saturated aqueous solution in synthetic progress of **1-Li** to obtain yellow crystals **1-NH<sub>4</sub>** in 56.2% yield based on the tppa ligand. Anal. Calcd (%) for  $\text{C}_{36}\text{H}_{54}\text{N}_{13}\text{O}_6\text{P}_2\text{Cu}_6\text{I}_7$  (Mr = 2096.45): C, 20.62; H, 2.60; N, 8.68; Cu, 18.19. Found (%): C, 20.29; H, 2.36; N, 8.96; Cu, 18.15. IR (KBr, main absorption bands): 3489( $\nu(\text{O-H})$ ), 3407( $\nu(\text{-NH})$ ), 3200( $\nu(\text{P=O})$ ), 2960( $\nu(\text{-CH}_3)$ ), 1580( $\nu(\text{C=C})$ ), 1465( $\nu(\text{C=C})$ ), 1380( $\nu(\text{-CH}_3)$ ), 1261( $\nu(\text{C-N})$ ), 1191( $\nu(\text{C-N})$ ), 1089( $\nu(\text{-NH})$ ), 952( $\delta(\text{Ar-H})$ ), 800( $\delta(\text{Ar-H})$ ) and 696( $\delta(\text{Ar-H})$ )  $\text{cm}^{-1}$ .

### Synthesis of $\{\text{K}(\text{H}_2\text{O})_2(\text{MeOH})_2[\text{Cu}_6\text{I}_7(\text{tppa})_2] \cdot \text{MeCN}\}_n$ (**1-K**)

A similar method to that of **1-Li** was employed, except EtOH and LiI saturated aqueous solution were replaced by MeOH and KI saturated aqueous solution addition respectively. After filtration and evaporation, yellow crystals were obtained. Yield: 45.3% based on the tppa ligand. Anal. Calcd (%) for  $\text{C}_{34}\text{H}_{45}\text{N}_{13}\text{O}_6\text{P}_2\text{KCu}_6\text{I}_7$  (Mr = 2102.46): C, 19.42; H, 2.16; N, 8.66; K, 1.86; Cu, 18.13. Found (%): C, 19.63; H, 2.21; N, 8.52; K, 1.61; Cu, 18.31. IR (KBr, main absorption bands): 3483( $\nu(\text{O-H})$ ), 3558( $\nu(\text{O-H})$ ), 3400( $\nu(\text{-NH})$ ), 3180 ( $\nu(\text{P=O})$ ), 2926( $\nu(\text{-CH}_3)$ ), 1580( $\nu(\text{C=C})$ ), 1468( $\nu(\text{C=C})$ ), 1272( $\nu(\text{C-N})$ ), 1193( $\nu(\text{C-N})$ ), 1050( $\nu(\text{C-N})$ ), 954( $\delta(\text{Ar-H})$ ), 789( $\delta(\text{Ar-H})$ ) and 693( $\delta(\text{Ar-H})$ )  $\text{cm}^{-1}$ .

### Synthesis of $\{[\text{N}(\text{Et})_4][\text{Cu}_6\text{I}_7(\text{tppa})_2]\}_n$ (**1-TEA**)

CuI (0.019 g, 0.1 mmol), tppa (0.010 g, 0.03 mmol) and tetraethylammonium iodide (TEAI) (0.1 g) were dissolved in a mixture of 2 mL MeCN and 5 mL EtOH, which then was placed in a glass vessel (15 mL) and heated at 85 °C for 24 h. Bright yellow crystals of **1-TEA** were obtained in 83.5% yield based on the tppa ligand. Anal. Calcd (%) for  $\text{C}_{38}\text{H}_{50}\text{N}_{13}\text{O}_2\text{P}_2\text{Cu}_6\text{I}_7$  (Mr = 2052.44): C, 22.24; H,

2.46; N, 8.87; Cu, 18.58. Found (%): C, 22.59; H, 2.50; N, 8.99; Cu, 18.20. IR (KBr, main absorption bands): 3410( $\nu$ (-NH)), 3200( $\nu$ (P=O)), 2960( $\nu$ (-CH<sub>3</sub>)), 2902( $\nu$ (-CH<sub>2</sub>)), 1580( $\nu$ (C=C)), 1465( $\nu$ (C=C)), 1380( $\nu$ (-CH<sub>3</sub>)), 1261( $\nu$ (C-N)), 1191( $\nu$ (C-N)), 1089( $\nu$ (C-N)), 952( $\delta$ (Ar-H)), 800( $\delta$ (Ar-H)) and 696( $\delta$ (Ar-H)) cm<sup>-1</sup>.

### Synthesis of {[N(Pr)<sub>4</sub>][Cu<sub>6</sub>I<sub>7</sub>(tpa)<sub>2</sub>]}<sub>n</sub> (1-TPA)

CuI (0.019 g, 0.1 mmol), tpa (0.010 g, 0.03 mmol) and tetrapropylammonium iodide (TPAI) (0.55 g) were dissolved in a mixture of 2 mL MeCN and 5 mL EtOH. After filtration and evaporation under ambient conditions for 5 days, light yellow powders were obtained in 79.0% yield based on the tpa ligand. Anal. Calcd (%) for C<sub>42</sub>H<sub>58</sub>N<sub>13</sub>O<sub>2</sub>P<sub>2</sub>Cu<sub>6</sub>I<sub>7</sub> (Mr = 2108.55): C, 23.92; H, 2.77; N, 8.64; Cu, 18.08. Found (%): C, 23.96; H, 2.77; N, 8.48; Cu, 17.76. IR (KBr, main absorption bands): 3324( $\nu$ (-NH)), 3201( $\nu$ (P=O)), 3050( $\nu$ (-CH<sub>3</sub>)), 2972( $\nu$ (-CH<sub>2</sub>)), 1580( $\nu$ (C=C)), 1465( $\nu$ (C=C)), 1380( $\nu$ (-CH<sub>3</sub>)), 1260( $\nu$ (C-N)), 1191( $\nu$ (C-N)), 1045( $\nu$ (C-N)), 952( $\delta$ (Ar-H)), 800( $\delta$ (Ar-H)) and 694( $\delta$ (Ar-H)) cm<sup>-1</sup>.

### Synthesis of [Cu<sub>2</sub>I<sub>2</sub>(tpa)<sub>2</sub>]<sub>n</sub> (2)

CuI (0.019 g, 0.1 mmol), tpa (0.010 g, 0.03 mmol) and tetrabutylammonium iodide (TBAI) (0.1 g) were dissolved in a mixture of 2 mL MeCN and 5 mL EtOH, which then was placed in a glass vessel (15 mL) and heated at 85 °C for 24 h. Yellow crystals of **2** were obtained in 58.1% yield based on the tpa ligand. Anal. Calcd (%) for C<sub>30</sub>H<sub>30</sub>N<sub>12</sub>O<sub>2</sub>P<sub>2</sub>Cu<sub>2</sub>I<sub>2</sub> (Mr = 1033.49): C, 34.86; H, 2.92; N, 16.26; Cu, 12.30. Found (%): C, 34.75; H, 2.83; N, 16.06; Cu, 12.47. IR (KBr, main absorption bands): 3393( $\nu$ (-NH)), 3209( $\nu$ (P=O)), 3070( $\nu$ (Ar-H)), 1577( $\nu$ (C=C)), 1482( $\nu$ (C=C)), 1215( $\nu$ (C-N)), 1052( $\nu$ (C-N)), 943( $\delta$ (Ar-H)), 805( $\delta$ (Ar-H)) and 702( $\delta$ (Ar-H)) cm<sup>-1</sup>.

### X-ray crystallography

Single-crystal X-ray diffraction data were collected on a Super Nova diffractometer equipped with a multilayer mirror Cu-K $\alpha$  radiation ( $\lambda$  = 1.5418 Å) using a  $\omega$  scan mode at 100 K. The structures were solved by direct methods and refined by full-matrix least-squares techniques on  $F^2$  with SHELX-97.<sup>3</sup> Anisotropic refinement was performed to all non-hydrogen atoms except the tetraethylammonium cation in **1-TEA**. Hydrogen atoms from ligands were generated geometrically,

while those on the solvent molecules could not be determined. The disordered solvents and  $\text{NH}_4$  cation in **1-NH<sub>4</sub>** were removed by the SQUEEZE process.<sup>4</sup> The final chemical formulas of the five compounds were calculated from solved results combined with TGA, elemental analysis, and ICP data. The CCDC numbers for **1-Li** to **1-TEA** and **2** are 1537508-1537512 and 1561914, respectively.

## Structure and property description of compound **2**

Single-crystal X-ray diffraction analyses reveal that the compound **2** crystallizes in *P*-1 space group, featuring a common neutral rhombohedral cluster  $\text{Cu}_2\text{I}_2$ . As Figure S1a shown, there are a ligand molecule, a Cu atom and an iodide atom in the asymmetric unit. Each Cu in the  $\text{Cu}_2\text{I}_2$  motif is tetrahedrally coordinated to two  $\mu_2$ -bridging I atoms and two N atoms from different ligands. The ligands serve as bidentate bridges connecting the neighboring  $\text{Cu}_2\text{I}_2$  motifs to form a one-dimensional (1D) chain. The third pyridine of the tripodal ligand does not participate in coordination but hangs beside the chain (Figure S1b). These chains then close pack along the *a* and *b* axes as Figure S1c and Figure S1d shown. The phase purity of compound **2** was confirmed by the PXRD (Figure S2).

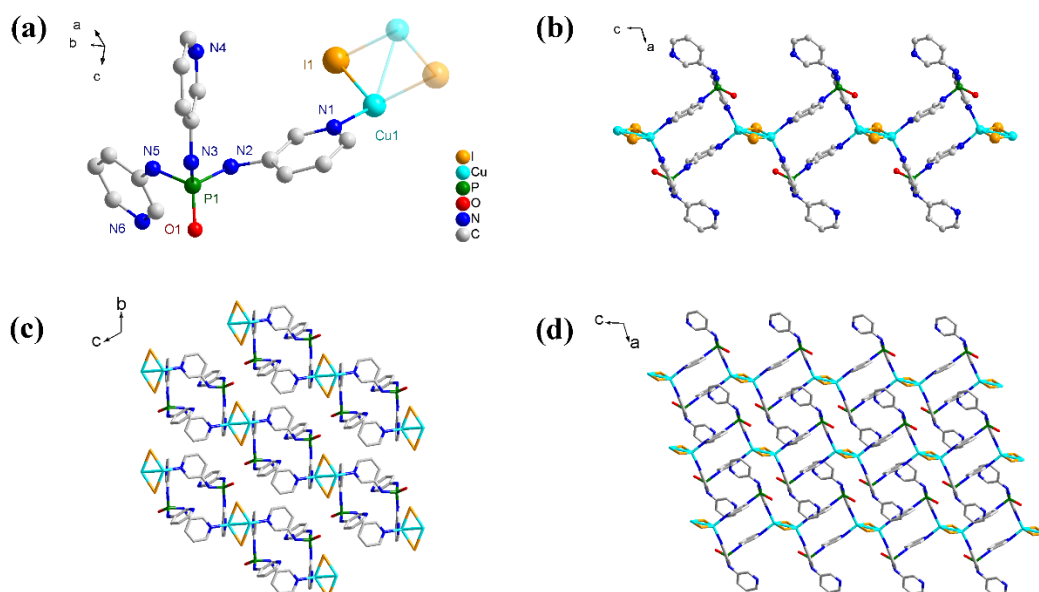

**Figure S1.** The structure presentation of **2**: (a) asymmetric unit; (b) 1D chain; (c) packing structure viewed along the *a* axis; (d) packing structure viewed along the *b* axis.

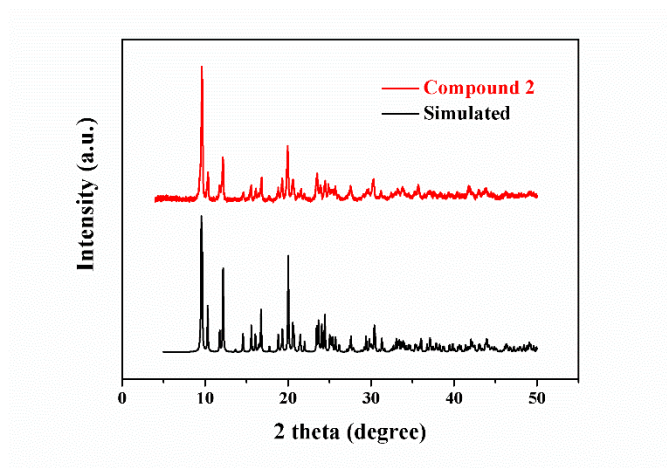

**Figure S2.** PXRD patterns of the compound **2**.

As Figure S3 shown, compound **2** exhibits an emission band with a maximum peak around 505 nm under excitation at 395 nm, which locates at (0.24, 0.47) in the CIE-1931 chromaticity diagram. The QY of **2** is  $4.4 \pm 0.8\%$ , and the lifetimes are 13.6  $\mu\text{s}$  and 2.17  $\mu\text{s}$  at 77 K and 298 K, respectively. The TGA analysis reveals that **2** decomposes at around 250  $^{\circ}\text{C}$  (Figure S4).

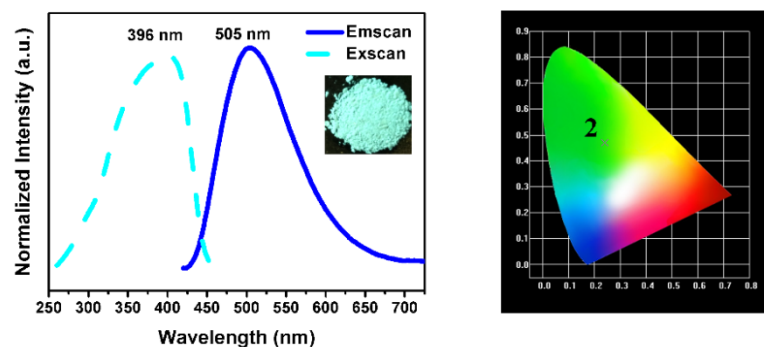

**Figure S3.** The photoluminescence spectra (left), powder sample under 365 nm UV light (insert) and CIE-1931 chromaticity diagram (right) of the compound **2**.

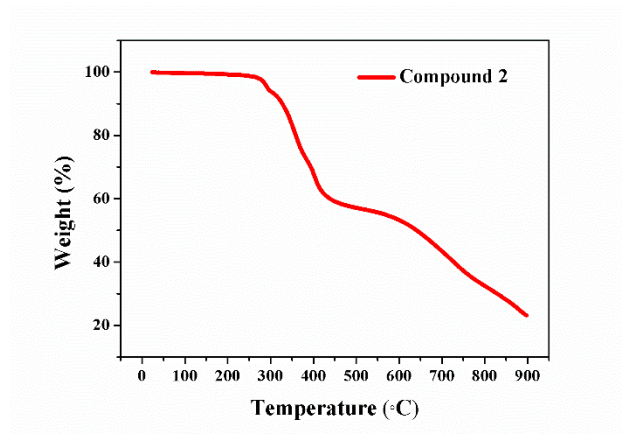

**Figure S4.** TG curve of compound **2**.



## Computational Descriptions

The crystallographic data of the **1-Li**, **1-Na**, **1-NH<sub>4</sub>**, **1-K**, and **1-TEA** were used to calculate their electronic densities of states. The calculations were performed with the CASTEP program and were based on density functional theory using a plane-wave basis set.<sup>5</sup> The exchange-correlation energy was calculated using the Perdew-Burke-Ernzerhof modification to the generalized gradient approximation.<sup>6</sup> The norm-conserving and ultrasoft pseudopotentials were chosen to modulate the electron-ion interaction for compounds **1-Li** to **1-K** and **1-TEA**, respectively.<sup>7</sup> The orbital electrons of C 2s<sup>2</sup>2p<sup>2</sup>, H 1s<sup>1</sup>, N 2s<sup>2</sup>2p<sup>3</sup>, O 2s<sup>2</sup>2p<sup>4</sup>, P 3s<sup>2</sup>3p<sup>3</sup>, I 5s<sup>2</sup>5p<sup>5</sup>, Li 2s<sup>1</sup>, Na 2s<sup>2</sup>2p<sup>6</sup>3s<sup>1</sup>, K 3s<sup>2</sup>3p<sup>6</sup>4s<sup>1</sup> and Cu 3d<sup>10</sup>4s<sup>2</sup> were treated as valence electrons. The number of plane waves included in the basis was determined by a cutoff energy of 800 eV and 240 eV for compounds **1-Li** to **1-K** and **1-TEA**, respectively. The numerical integration of the Brillouin zone was performed by using  $1 \times 1 \times 1$  Monkhorst Pack *k*-point sampling for all compounds. Other parameters used in the calculations were set by the default values of the CASTEP code.

## LEDs fabrication and performance measurement

Two-component white LEDs of different contents of **1-TEA** were fabricated by combining UV chips (380 nm, 1W, 350 mA, Epileds), BAM:Eu<sup>2+</sup> blue phosphor and **1-TEA** yellow phosphor. The two-component phosphors were mixed with silicone thoroughly and the obtained phosphor-silicone mixture was coated on the surface of the LED chips to produce LEDs. The photoelectric properties of the fabricated devices were measured by an integrating sphere spectroradiometer system (LHS-1000, Everfine). The LEDs were operated at 3.0 V with drive currents of 350 mA. The spectral power distributions of the LEDs were measured by a corrected spectrometer to calculate their values of CCT and CRI.<sup>8</sup> The current density–voltage–brightness (I–V–B) curves of the devices were recorded on a Keithley 2400/2000 source meter and a calibrated silicon photodiode. All measurements on the devices were carried out at room temperature.

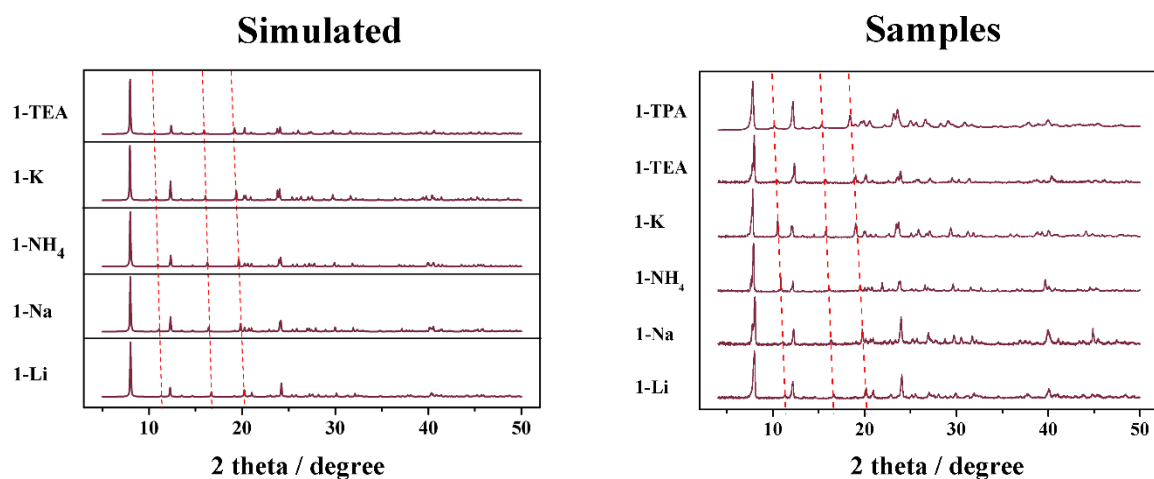

**Figure S5.** PXRD patterns of the compounds **1-Li**, **1-Na**, **1-NH<sub>4</sub>**, **1-K**, **1-TEA**, and **1-TPA**.

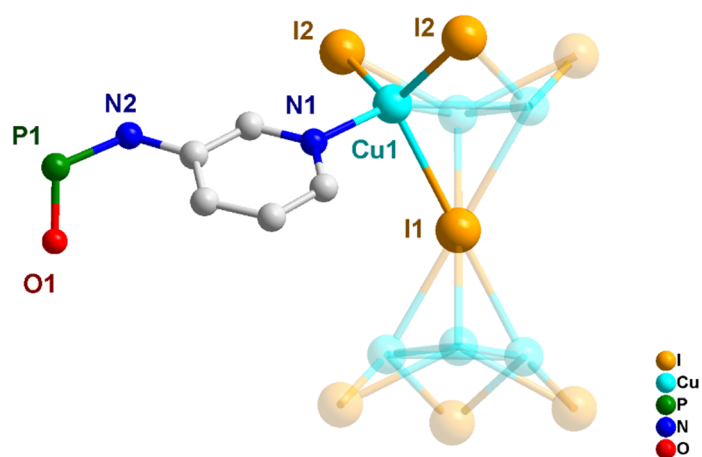

**Figure S6.** The coordination environment of the Cu(I) in the  $\text{Cu}_6\text{I}_7^-$  cluster.

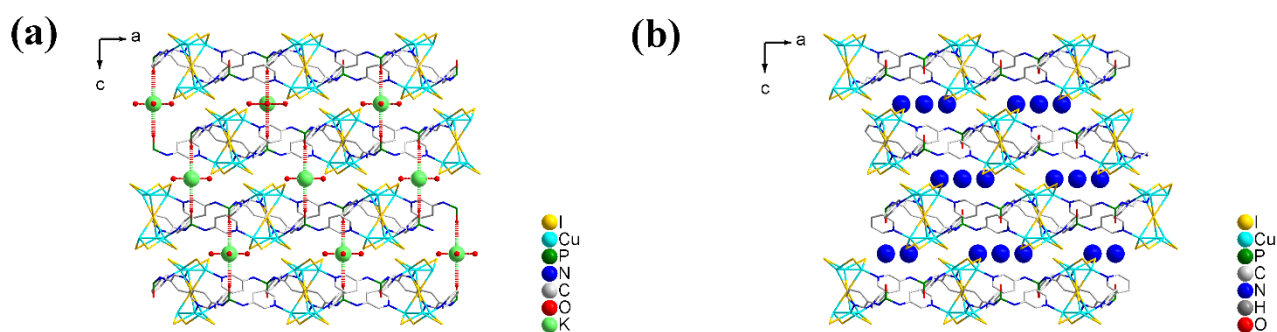

**Figure S7.** (a) Real structure model of the complexes with alkali metal cations (**1-K** as a representative). (b) Real structure model of the complexes with ammonium cations (**1-NH<sub>4</sub>** as a representative).

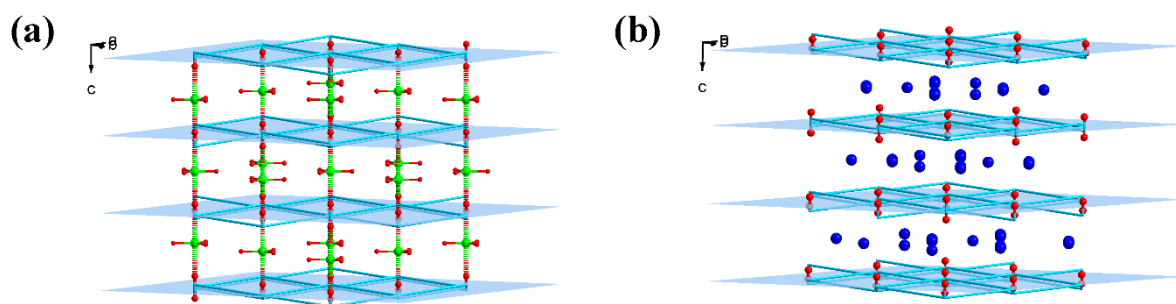

**Figure S8.** (a) Illustration of interlamellar structure in the complexes with alkali metal cations (**1-K** as a representative). (b) Illustration of interlamellar structure in the complexes with ammonium cations (**1-NH<sub>4</sub>** as a representative). Color scheme of the balls: K<sup>+</sup>, green; NH<sub>4</sub><sup>+</sup>, blue; O, red; layer, cyan. Ligands and clusters are omitted for clarity.

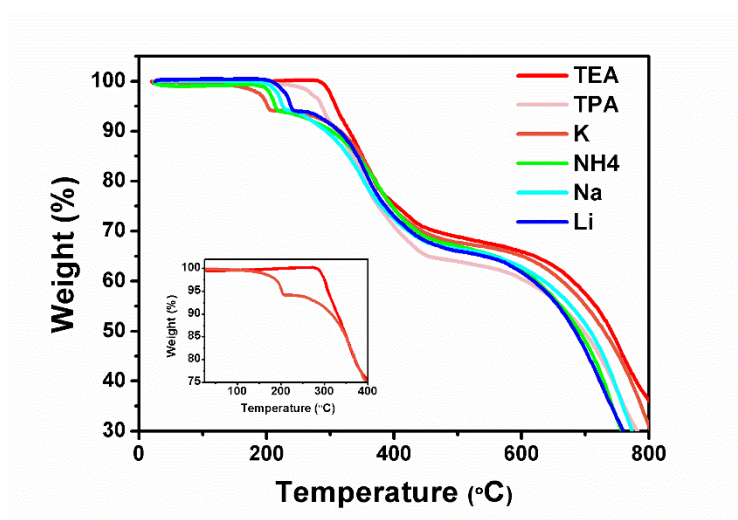

**Figure S9.** TG curves of the six compounds. Inner: the amplification of **1-K** and **1-TEA** curves.

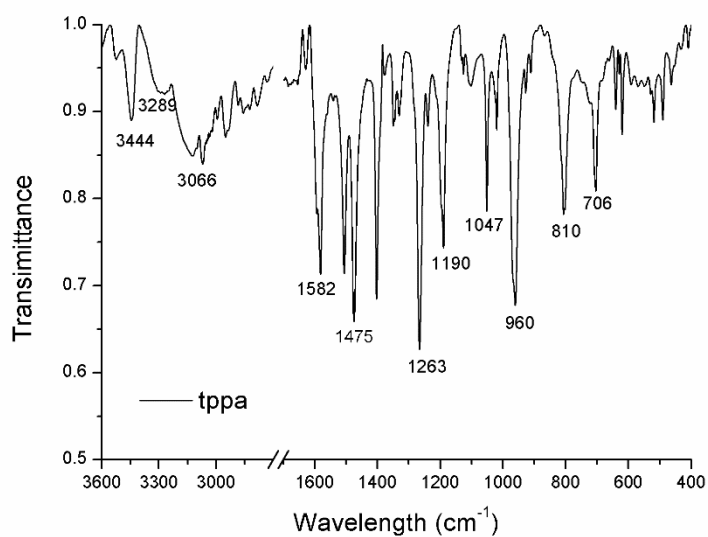

**Figure S10.** FT-IR spectrum of the ligand (tpa) with labeled main peaks.

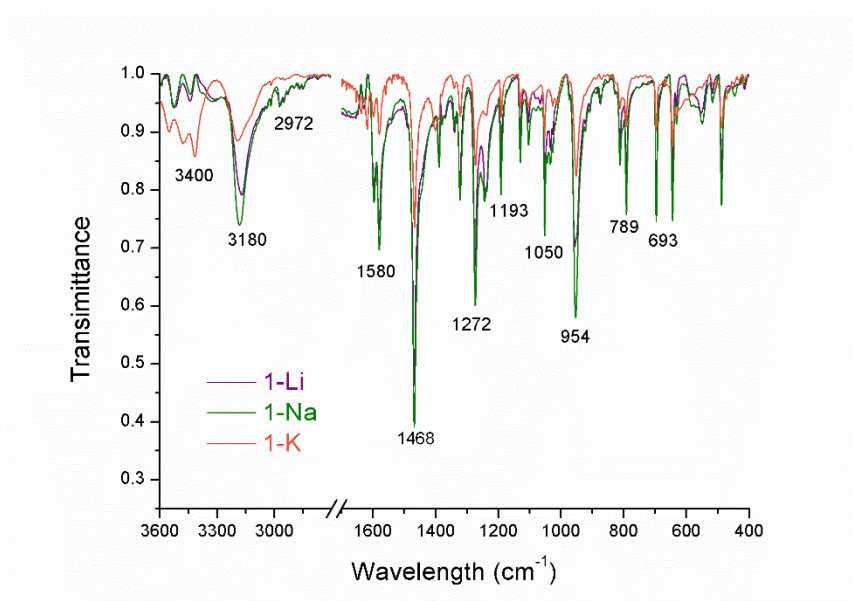

**Figure S11.** FT-IR spectra of the compounds **1-Li**, **1-Na**, and **1-K** with labeled main peaks.

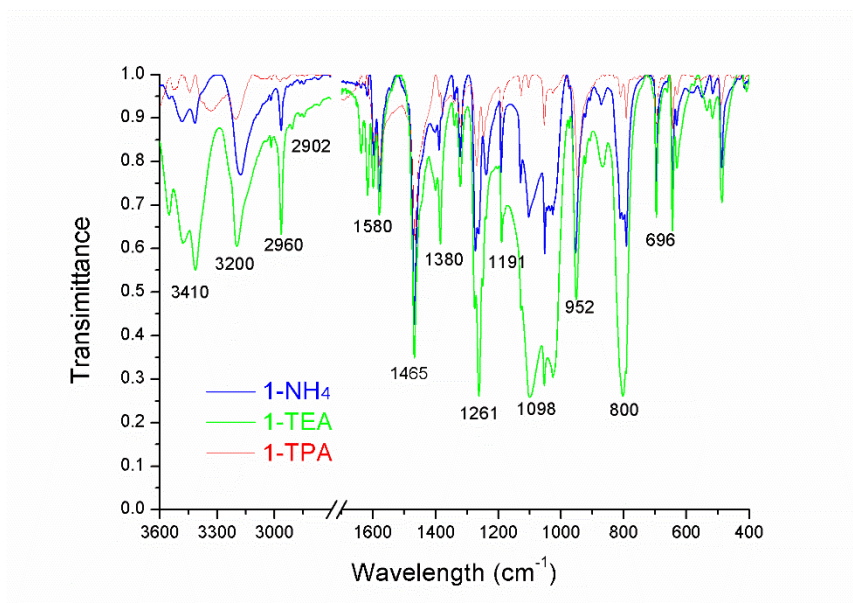

**Figure S12.** FT-IR spectra of the compounds **1-NH<sub>4</sub>**, **1-TEA**, and **1-TPA** with labeled main peaks.

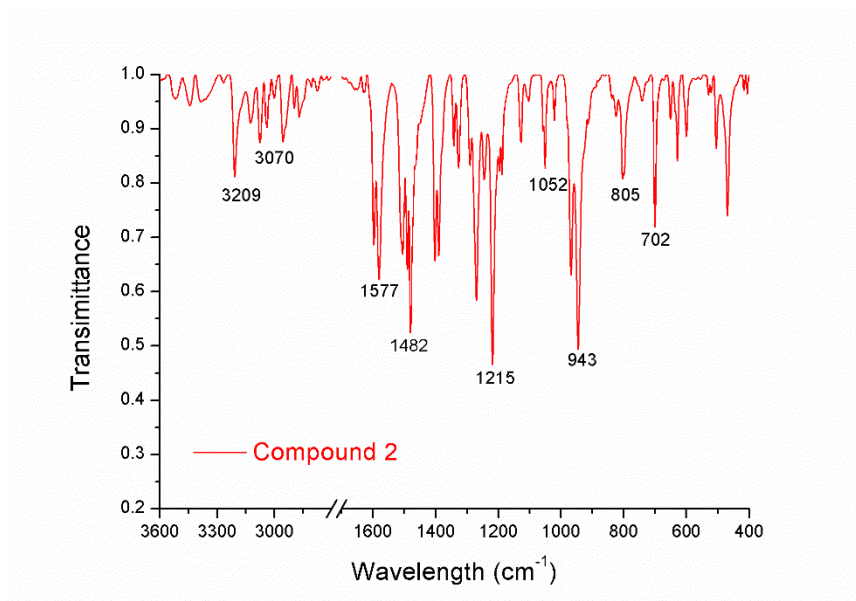

**Figure S13.** FT-IR spectrum of the compound **2** with labeled main peaks.

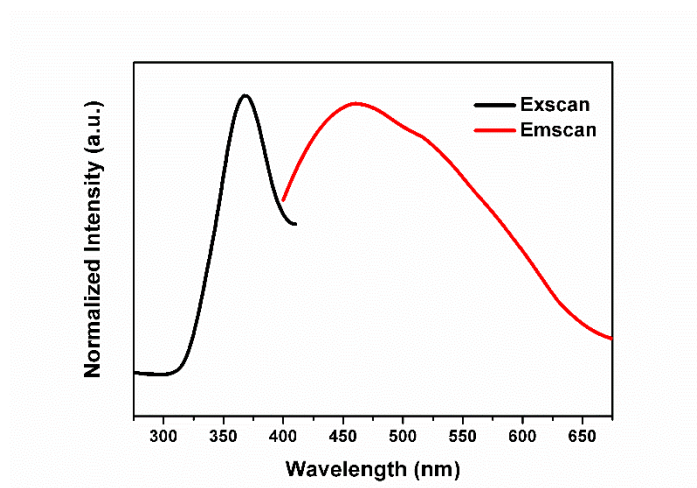

**Figure S14.** The excitation (black) and emission (red) spectra of the ligand (tpa).

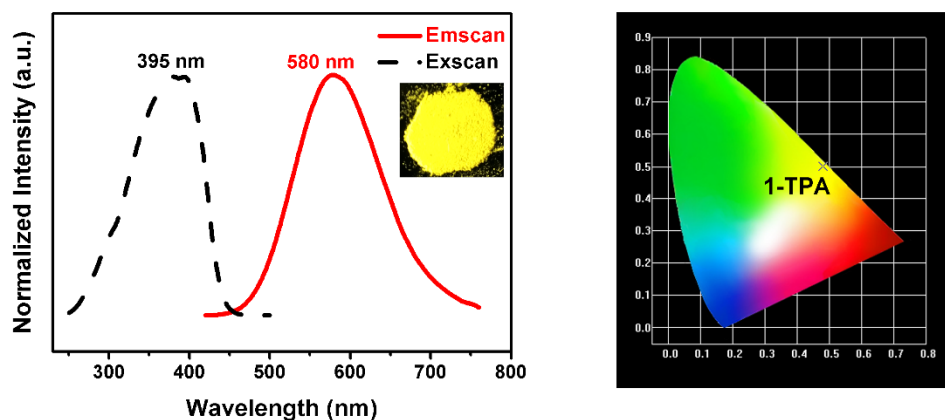

**Figure S15.** The photoluminescence spectra (left), powder sample under 365 nm UV light (insert) and CIE-1931 chromaticity diagram (right) of the compound **1-TPA**.

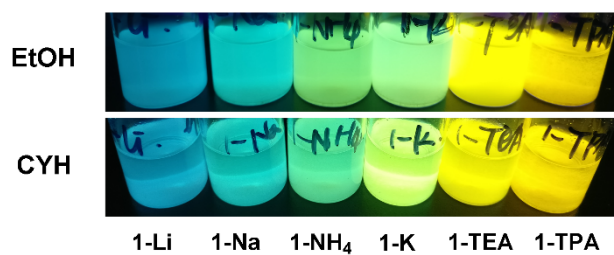

**Figure S16.** Photoluminescence images of the six compounds dispersing in EtOH (upper) and cyclohexane (nether) under the 365 nm UV light.

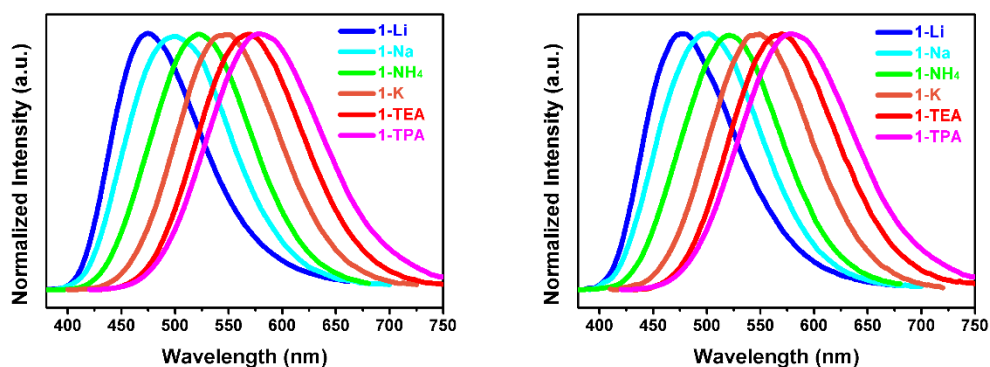

**Figure S17.** The emission spectra of the six compounds dispersing in EtOH (left) and cyclohexane (right).

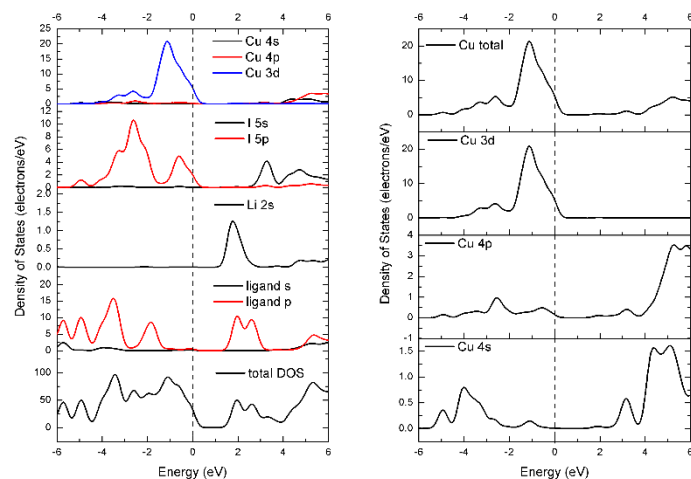

**Figure S18.** Calculated DOS for **1-Li**: total and partial DOS (left); Cu partial DOS (right).

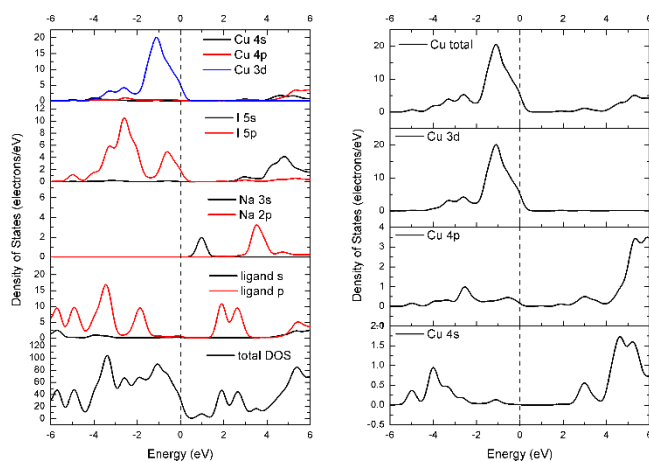

**Figure S19.** Calculated DOS for **1-Na**: total and partial DOS (left); Cu partial DOS (right).

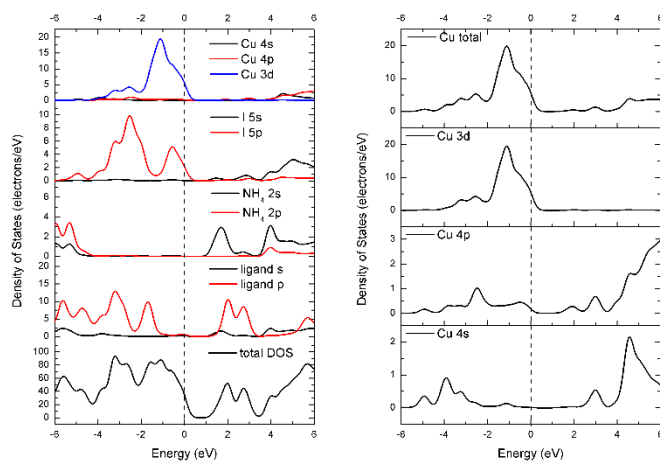

**Figure S20.** Calculated DOS for **1-NH<sub>4</sub>**: total and partial DOS (left); Cu partial DOS (right).



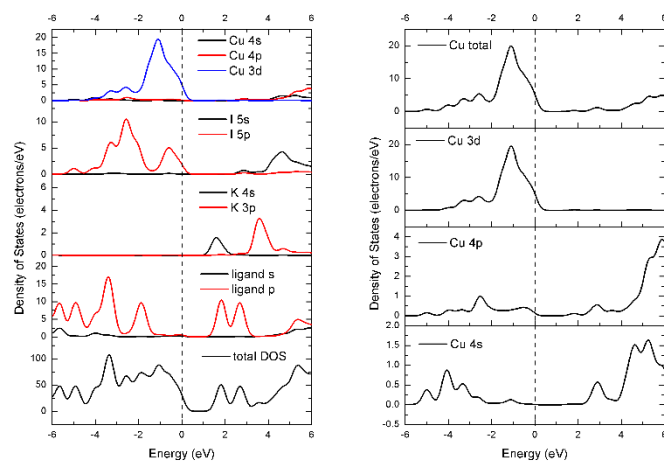

**Figure S21.** Calculated DOS for **1-K**: total and partial DOS (left); Cu partial DOS (right).

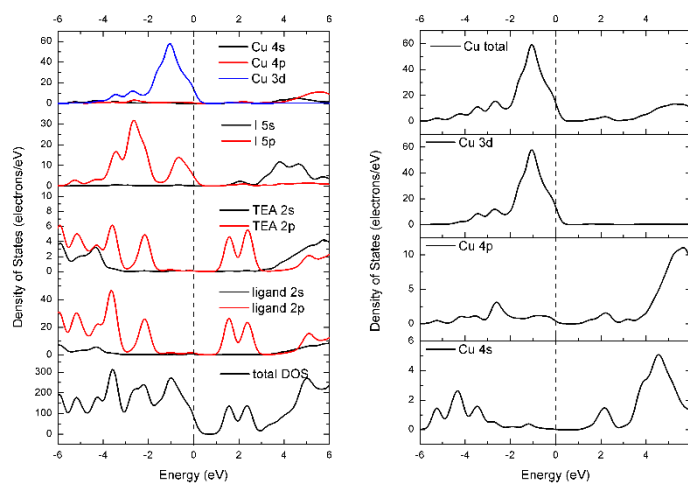

**Figure S22.** Calculated DOS for **1-TEA**: total and partial DOS (left); Cu partial DOS (right).

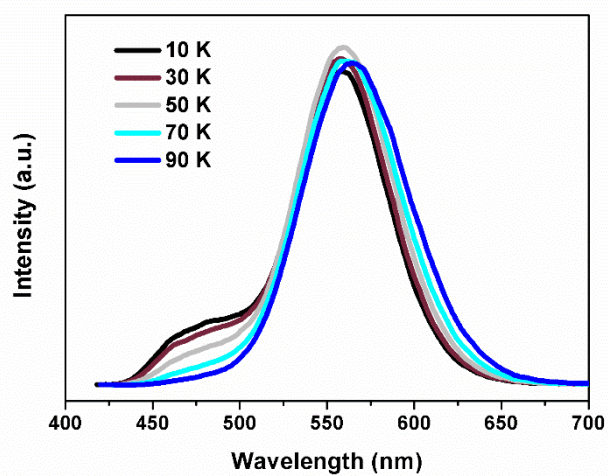

**Figure S23.** Luminescence spectra of **1-K** excited at 375 nm at low temperature.



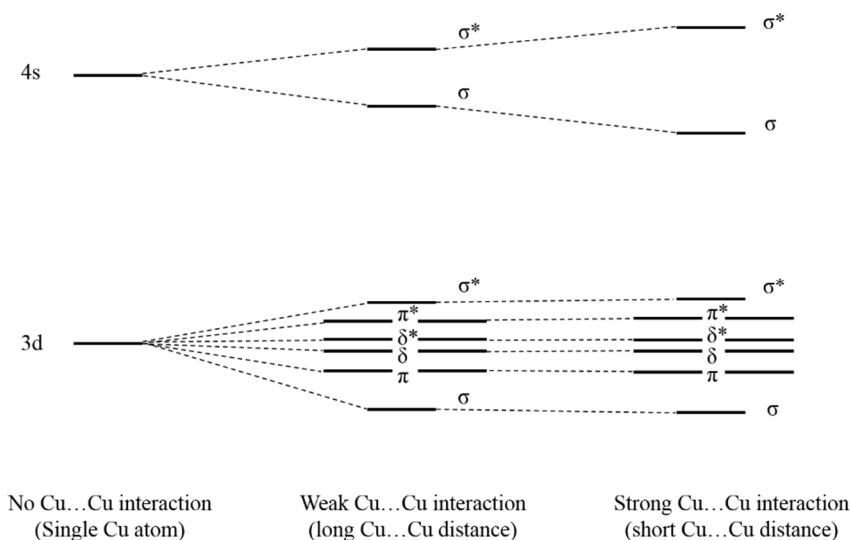

**Scheme S1.** A schematic representation of the relationship between the Cu...Cu interactions and the splittings of the frontier metal orbitals (3d  $\rightarrow$  4s as a representative).

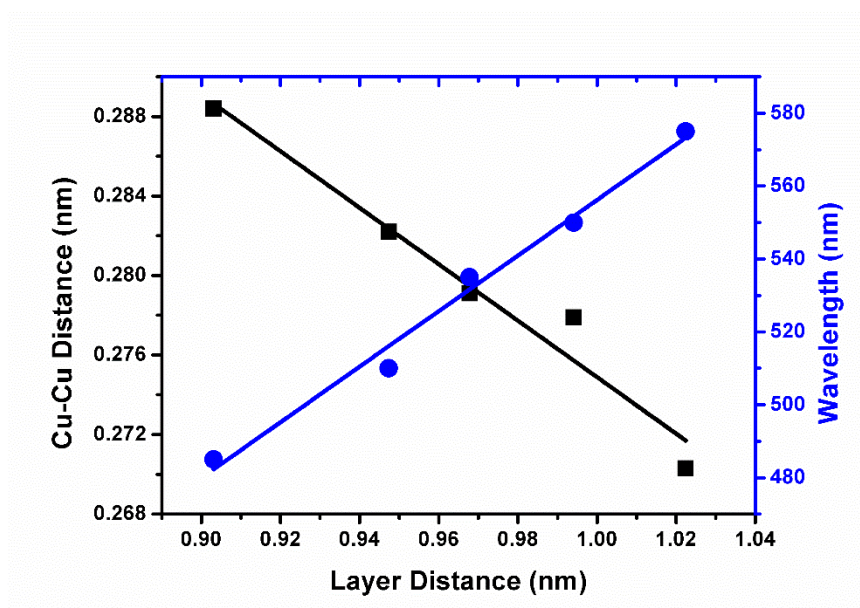

**Scheme S2.** Relationship of the Cu-Cu distance (left, black) and the emission wavelength (right, blue) with the layer distance of the five compounds. The linear fits show Equations  $y = -0.142x + 0.417$ ,  $R^2 = 0.947$  (left, black) and  $y = 762x - 206$ ,  $R^2 = 0.983$  (right, blue).

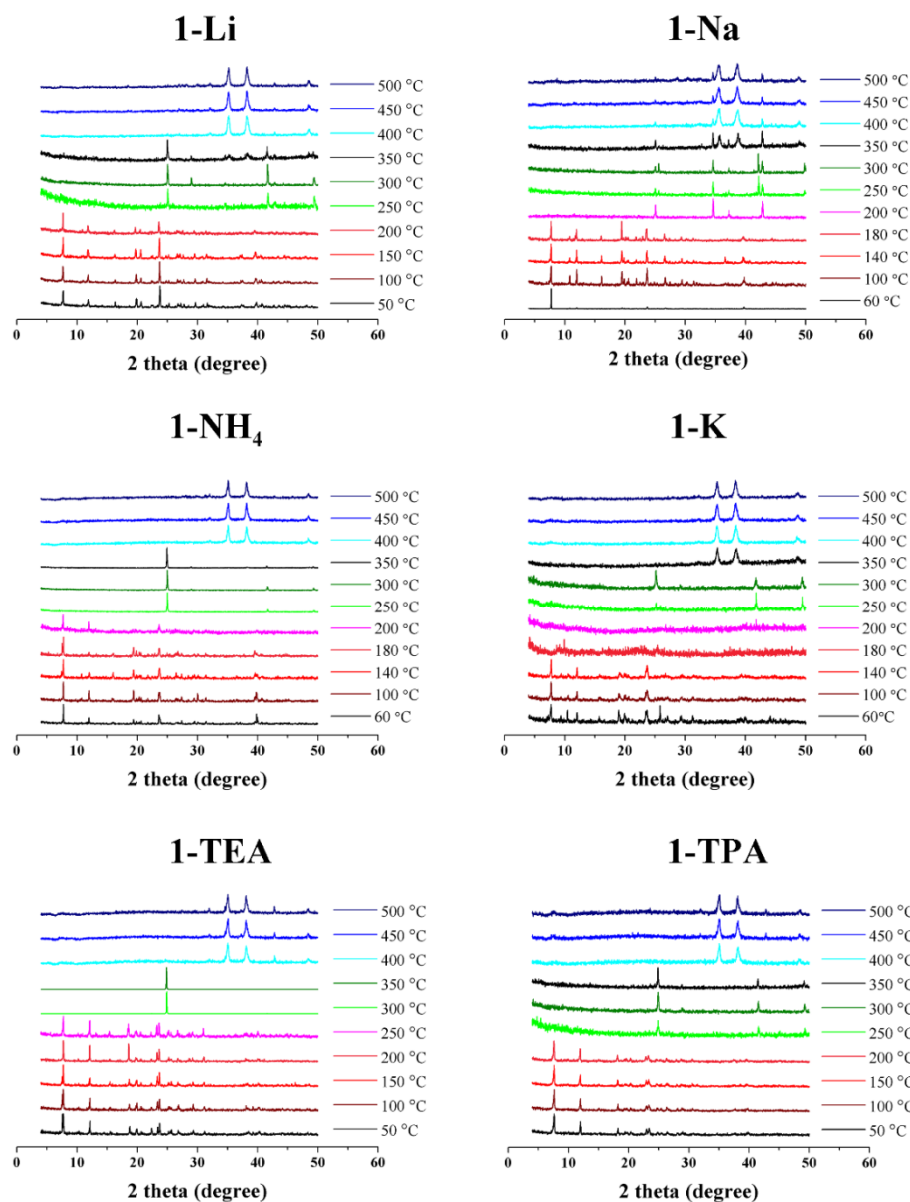

**Figure S24.** TD-PXRD patterns of the compounds **1-Li**, **1-Na**, **1-NH<sub>4</sub>**, **1-K**, **1-TEA**, and **1-TPA**.

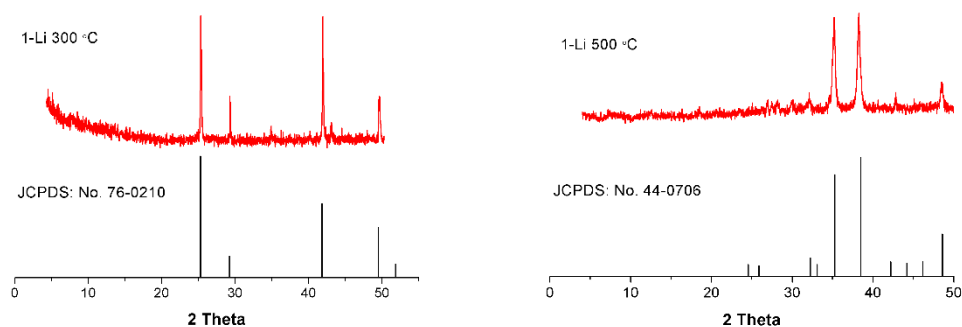

**Figure S25.** PXRD patterns of **1-Li** at 300 °C (left) in accordance with CuI structure (JCPDS: No. 76-0210) and at 500 °C in accordance with CuO structure (JCPDS: No. 44-0706) (right).

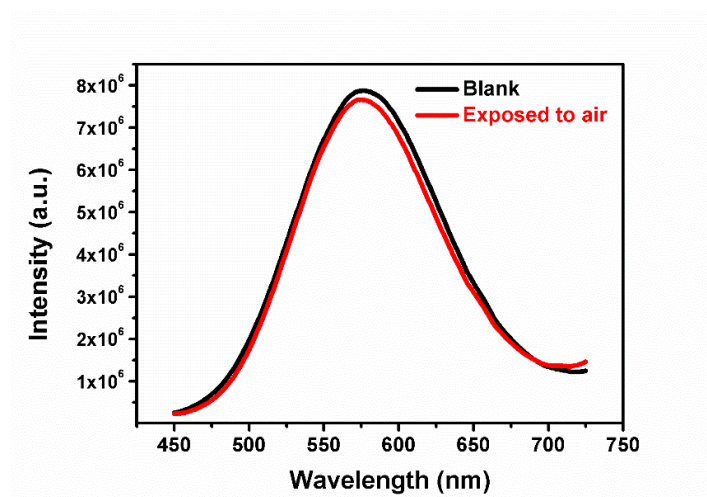

**Figure S26.** PL intensity of 1-TEA after exposed to open air for six months (red) and freshly prepared (black).

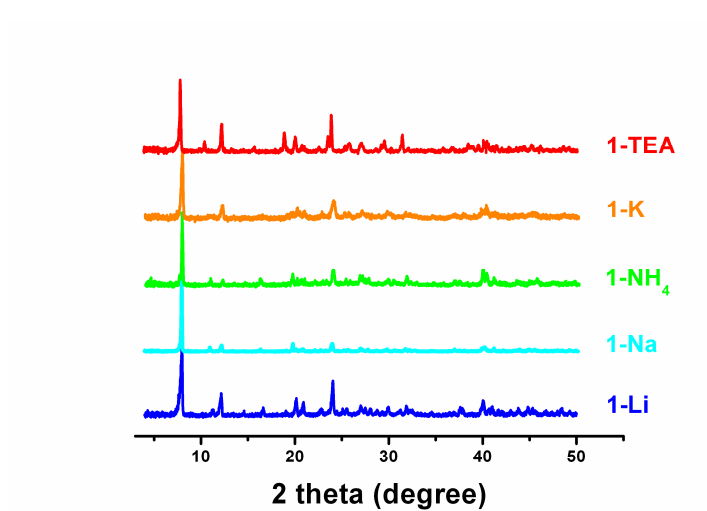

**Figure S27.** PXRD patterns of the five compounds after heating at 120 °C for 48 h.

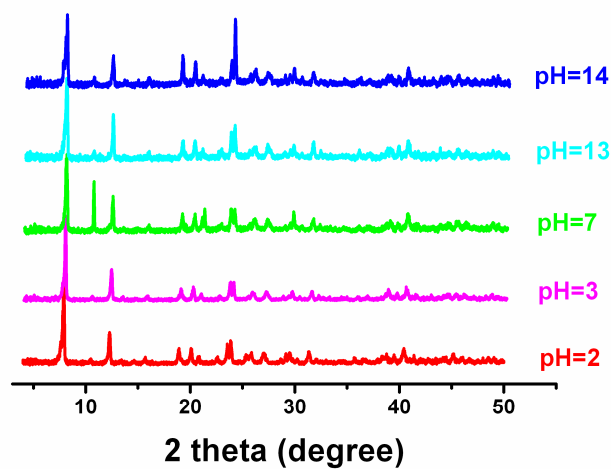

**Figure S28.** PXRD patterns of 1-TEA after immersing in pH 2-14 buffer solutions for 24 h.

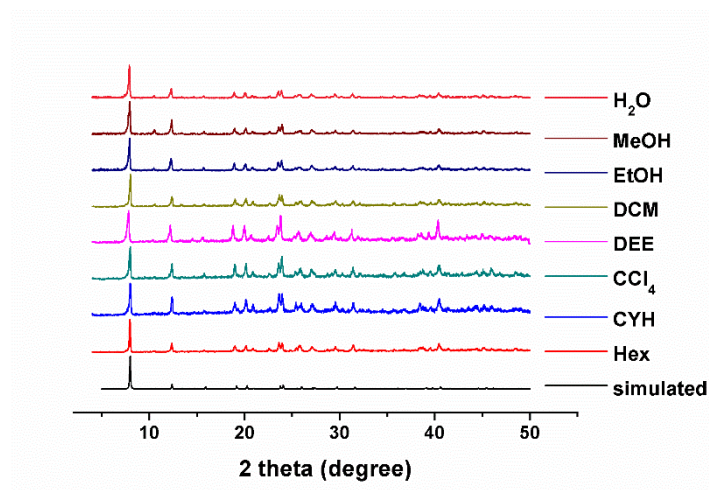

**Figure S29.** PXRD patterns of **1-TEA** after soaking in water ( $\text{H}_2\text{O}$ ), methanol ( $\text{MeOH}$ ), ethanol ( $\text{EtOH}$ ), dichloromethane ( $\text{DCM}$ ), diethyl ether ( $\text{DEE}$ ), tetrachloromethane ( $\text{CCl}_4$ ), cyclohexane ( $\text{CYH}$ ) and hexane ( $\text{Hex}$ ) solvents for 35 days.

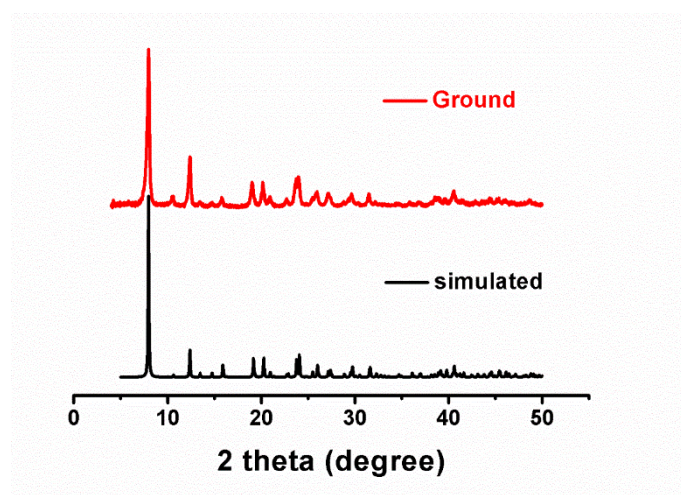

**Figure S30.** PXRD patterns of **1-TEA** after ball milling at 30 Hz for 30 min.

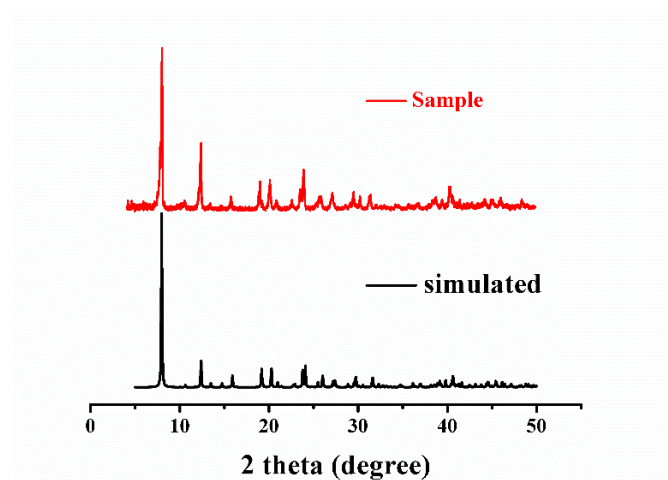

**Figure S31.** PXRD patterns of **1-TEA** after exposed to open air for six months.

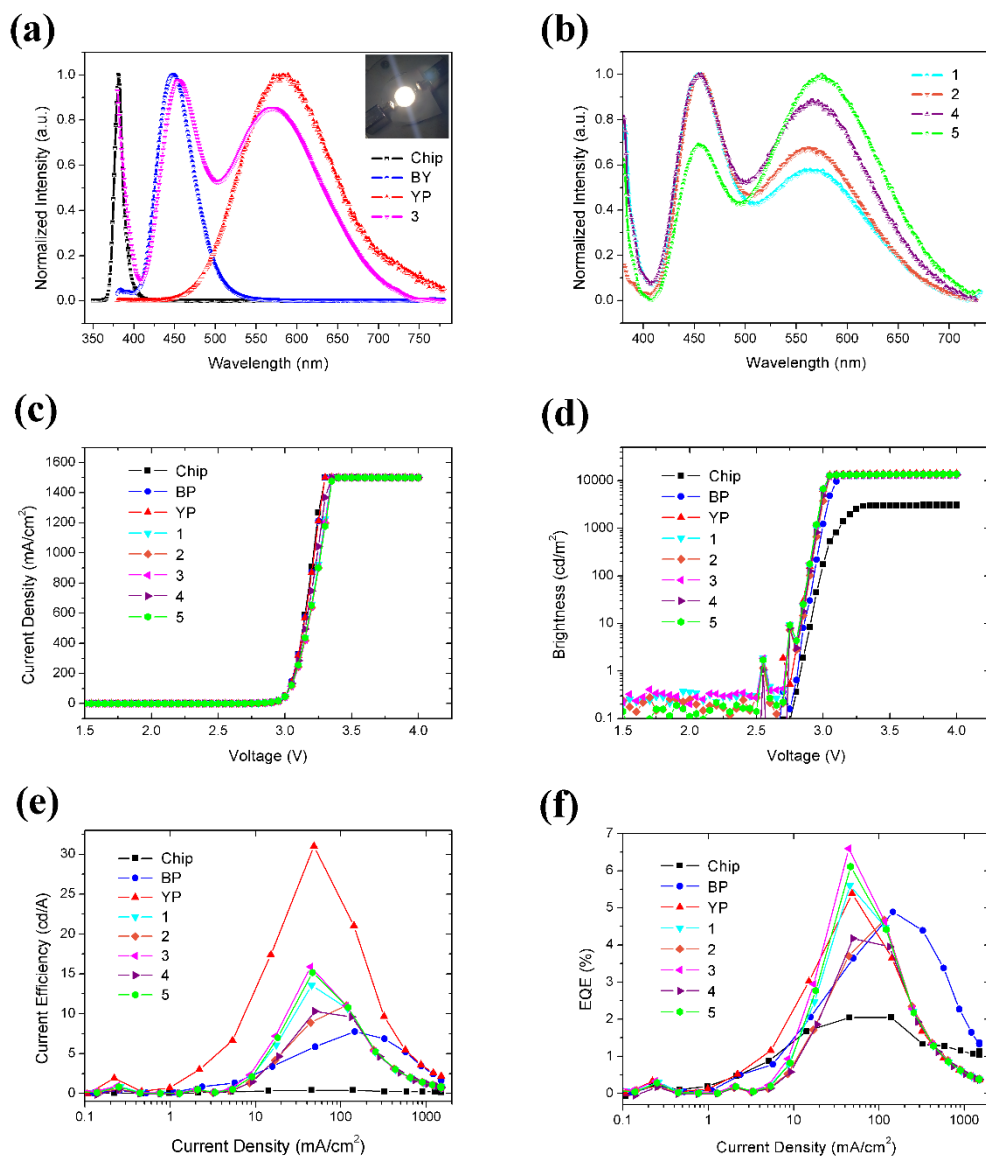

**Figure S32.** (a) EL spectra of the chip, BP (BAM: Eu<sup>2+</sup>), YP (1-TEA), and the 3 LEDs. Inset: lighted LED of 3. (b) EL spectra of 1, 2, 4, and 5 LEDs. Current density-voltage (I-V) curves (c), brightness-voltage (B-V) curves (d), plots of current efficiency vs current density (e) and plots of external quantum efficiency vs current density (f) for the LEDs.

**Table S1.** Important photoelectric parameters for LEDs **1-5**.

| <b>Device</b> | <b>YP<br/>amount<br/>(wt%)</b> | <b>V<sub>on</sub><br/>(V)</b> | <b>B<sub>max</sub><br/>(cd/m<sup>2</sup>)</b> | <b>CE<sub>max</sub><br/>(cd/A)</b> | <b>EQE<sub>max</sub><br/>(%)</b> | <b>CIE</b>        | <b>CRI</b> | <b>CCT</b> |
|---------------|--------------------------------|-------------------------------|-----------------------------------------------|------------------------------------|----------------------------------|-------------------|------------|------------|
| <b>Chip</b>   | -                              | 2.85                          | 3166                                          | 0.4                                | 2.1                              | 0.1900,<br>0.0787 | -          | -          |
| <b>BP</b>     | 0                              | 2.85                          | 13770                                         | 6.8                                | 4.9                              | 0.1453,<br>0.0614 | -          | -          |
| <b>YP</b>     | 100                            | 2.70                          | 14205                                         | 31.0                               | 5.4                              | 0.4748<br>0.4941  | -          | -          |
| <b>1</b>      | 1.7                            | 2.75                          | 13178                                         | 9.1                                | 4.2                              | 0.2881,<br>0.2933 | 86.5       | 8950       |
| <b>2</b>      | 2.6                            | 2.75                          | 13514                                         | 11.0                               | 4.7                              | 0.2960,<br>0.3136 | 81.6       | 7744       |
| <b>3</b>      | 4.1                            | 2.70                          | 13422                                         | 15.9                               | 6.6                              | 0.3261,<br>0.3345 | 83.8       | 5850       |
| <b>4</b>      | 7.5                            | 2.75                          | 13441                                         | 10.3                               | 4.2                              | 0.3243,<br>0.3469 | 79.7       | 5794       |
| <b>5</b>      | 8.0                            | 2.75                          | 13931                                         | 15.2                               | 6.1                              | 0.3592,<br>0.3819 | 76.1       | 4628       |

**Table S2.** Crystal data and refinement results for **1-Li**, **1-Na**, **1-NH<sub>4</sub>**, **1-K**, **1-TEA**, and **2**.

| Compound                                 | <b>1-Li</b>                                                                                                    | <b>1-Na</b>                                                                                                    | <b>1-NH<sub>4</sub></b>                                                                                      |
|------------------------------------------|----------------------------------------------------------------------------------------------------------------|----------------------------------------------------------------------------------------------------------------|--------------------------------------------------------------------------------------------------------------|
| Formula                                  | C <sub>36</sub> H <sub>50</sub> N <sub>12</sub> O <sub>6</sub> P <sub>2</sub> LiCu <sub>6</sub> I <sub>7</sub> | C <sub>36</sub> H <sub>50</sub> N <sub>12</sub> O <sub>6</sub> P <sub>2</sub> NaCu <sub>6</sub> I <sub>7</sub> | C <sub>36</sub> H <sub>54</sub> N <sub>13</sub> O <sub>6</sub> P <sub>2</sub> Cu <sub>6</sub> I <sub>7</sub> |
| Formula weight                           | 2085.36                                                                                                        | 2101.40                                                                                                        | 2096.45                                                                                                      |
| Crystal system                           | trigonal                                                                                                       | trigonal                                                                                                       | trigonal                                                                                                     |
| space group                              | <i>R</i> -3 <i>c</i>                                                                                           | <i>R</i> -3 <i>c</i>                                                                                           | <i>R</i> -3 <i>c</i>                                                                                         |
| <i>a</i> / <i>b</i> (Å)                  | 14.4114 (5)                                                                                                    | 14.3640(2)                                                                                                     | 14.3430(2)                                                                                                   |
| <i>c</i> (Å)                             | 46.858 (2)                                                                                                     | 47.9353(8)                                                                                                     | 48.4451(9)                                                                                                   |
| <i>α</i> / <i>β</i> (°)                  | 90°                                                                                                            | 90°                                                                                                            | 90°                                                                                                          |
| <i>γ</i> (°)                             | 120°                                                                                                           | 120°                                                                                                           | 120°                                                                                                         |
| Volume ( Å <sup>3</sup> )                | 8428.0 (7)                                                                                                     | 8565.2(3)                                                                                                      | 8631.0(3)                                                                                                    |
| T (K)                                    | 100                                                                                                            | 100                                                                                                            | 100                                                                                                          |
| <i>Z</i>                                 | 6                                                                                                              | 6                                                                                                              | 6                                                                                                            |
| F (000)                                  | 5616                                                                                                           | 5520                                                                                                           | 5310                                                                                                         |
| R <sub>1</sub> (I>2σ(I))                 | 0.0442                                                                                                         | 0.0341                                                                                                         | 0.0335                                                                                                       |
| wR <sub>2</sub> (reflections)            | 0.1226                                                                                                         | 0.0984                                                                                                         | 0.1128                                                                                                       |
| Goodness of fit on <i>F</i> <sup>2</sup> | 1.050                                                                                                          | 1.090                                                                                                          | 1.125                                                                                                        |
| Compound                                 | <b>1-K</b>                                                                                                     | <b>1-TEA</b>                                                                                                   | <b>2</b>                                                                                                     |
| Formula                                  | C <sub>34</sub> H <sub>45</sub> N <sub>13</sub> O <sub>6</sub> P <sub>2</sub> KCu <sub>6</sub> I <sub>7</sub>  | C <sub>38</sub> H <sub>50</sub> N <sub>13</sub> O <sub>2</sub> P <sub>2</sub> Cu <sub>6</sub> I <sub>7</sub>   | C <sub>15</sub> H <sub>15</sub> N <sub>6</sub> OPCuI                                                         |
| Formula weight                           | 2102.46                                                                                                        | 2052.44                                                                                                        | 899.06                                                                                                       |
| Crystal system                           | trigonal                                                                                                       | trigonal                                                                                                       | triclinic                                                                                                    |
| space group                              | <i>R</i> -3 <i>c</i>                                                                                           | <i>R</i> -3 <i>c</i>                                                                                           | <i>P</i> -1                                                                                                  |
| <i>a</i> (Å)                             | 14.3646(8)                                                                                                     | 14.2783(4)                                                                                                     | 9.0437(6)                                                                                                    |
| <i>b</i> (Å)                             | 14.3646(8)                                                                                                     | 14.2783(4)                                                                                                     | 10.8072(6)                                                                                                   |
| <i>c</i> (Å)                             | 49.201(3)                                                                                                      | 49.8573(14)                                                                                                    | 10.8381(7)                                                                                                   |
| <i>α</i> (°)                             | 90°                                                                                                            | 90°                                                                                                            | 116.350(6)°                                                                                                  |
| <i>β</i> (°)                             | 90°                                                                                                            | 90°                                                                                                            | 102.549(6) °                                                                                                 |
| <i>γ</i> (°)                             | 120°                                                                                                           | 120°                                                                                                           | 96.607(5)°                                                                                                   |
| Volume ( Å <sup>3</sup> )                | 8792.1(13)                                                                                                     | 8802.6(6)                                                                                                      | 899.06(12)                                                                                                   |
| T (K)                                    | 100                                                                                                            | 100                                                                                                            | 100                                                                                                          |
| <i>Z</i>                                 | 6                                                                                                              | 6                                                                                                              | 2                                                                                                            |
| F (000)                                  | 5424                                                                                                           | 5640                                                                                                           | 504.0                                                                                                        |
| R <sub>1</sub> (I>2σ(I))                 | 0.0471                                                                                                         | 0.0358                                                                                                         | 0.0315                                                                                                       |
| wR <sub>2</sub> (reflections)            | 0.1413                                                                                                         | 0.1055                                                                                                         | 0.0819                                                                                                       |
| Goodness of fit on F <sub>2</sub>        | 1.104                                                                                                          | 1.241                                                                                                          | 1.055                                                                                                        |

**Table S3.** Selected bond lengths (Å) and bond angles (°) for **1-Li**, **1-Na**, **1-NH<sub>4</sub>**, **1-K**, and **1-TEA**.

|                                          | <b>1-Li</b> | <b>1-Na</b> | <b>1-NH<sub>4</sub></b> | <b>1-K</b>  | <b>1-TEA</b> |
|------------------------------------------|-------------|-------------|-------------------------|-------------|--------------|
| I1—Cu1 <sup>i</sup>                      | 2.8424 (12) | 2.8425 (9)  | 2.8430 (5)              | 2.8501 (13) | 2.8728 (10)  |
| I1—Cu1 <sup>ii</sup>                     | 2.8426 (12) | 2.8425 (9)  | 2.8431 (5)              | 2.8501 (13) | 2.8728 (10)  |
| I1—Cu1                                   | 2.8426 (11) | 2.8425 (9)  | 2.8431 (5)              | 2.8501 (13) | 2.8728 (10)  |
| I1—Cu1 <sup>iii</sup>                    | 2.8426 (11) | 2.8425 (9)  | 2.8431 (5)              | 2.8502 (13) | 2.8728 (10)  |
| I1—Cu1 <sup>iv</sup>                     | 2.8426 (11) | 2.8426 (9)  | 2.8431 (5)              | 2.8501 (13) | 2.8728 (10)  |
| I1—Cu1 <sup>v</sup>                      | 2.8426 (11) | 2.8426 (9)  | 2.8431 (5)              | 2.8502 (13) | 2.8728 (10)  |
| I2—Cu1                                   | 2.5903 (12) | 2.5898 (10) | 2.5916 (5)              | 2.5933 (14) | 2.5998 (11)  |
| I2—Cu1 <sup>ii</sup>                     | 2.5919 (12) | 2.5958 (10) | 2.5969 (5)              | 2.5948 (14) | 2.6038 (11)  |
| Cu1—N1                                   | 2.059 (6)   | 2.062 (5)   | 2.060 (2)               | 2.049 (8)   | 2.050 (6)    |
| Cu1—I2 <sup>i</sup>                      | 2.5904 (12) | 2.5898 (9)  | 2.5916 (5)              | 2.5947 (14) | 2.5998 (10)  |
| Cu1—Cu1 <sup>i</sup>                     | 2.8843 (19) | 2.8215 (16) | 2.7917 (7)              | 2.779 (2)   | 2.7031 (17)  |
| Cu1—Cu1 <sup>ii</sup>                    | 2.8843 (19) | 2.8216 (16) | 2.7917 (7)              | 2.779 (2)   | 2.7031 (17)  |
| Cu1 <sup>i</sup> —I1—Cu1 <sup>ii</sup>   | 60.97 (4)   | 59.51 (3)   | 58.809 (14)             | 58.36 (4)   | 56.13 (3)    |
| Cu1 <sup>i</sup> —I1—Cu1                 | 60.97 (4)   | 59.51 (3)   | 58.809 (14)             | 58.36 (4)   | 56.13 (3)    |
| Cu1 <sup>ii</sup> —I1—Cu1                | 60.97 (4)   | 59.51 (3)   | 58.809 (14)             | 58.36 (4)   | 56.13 (3)    |
| Cu1 <sup>i</sup> —I1—Cu1 <sup>iii</sup>  | 180.0       | 180.00 (2)  | 180.000 (10)            | 180.0       | 180.0        |
| Cu1 <sup>ii</sup> —I1—Cu1 <sup>iii</sup> | 119.03 (4)  | 120.49 (3)  | 121.191 (14)            | 121.64 (4)  | 123.87 (3)   |
| Cu1—I1—Cu1 <sup>iii</sup>                | 119.03 (4)  | 120.49 (3)  | 121.191 (14)            | 121.64 (4)  | 123.87 (3)   |
| Cu1 <sup>i</sup> —I1—Cu1 <sup>iv</sup>   | 119.03 (4)  | 120.49 (3)  | 121.191 (14)            | 121.64 (4)  | 123.87 (3)   |
| Cu1 <sup>ii</sup> —I1—Cu1 <sup>iv</sup>  | 119.03 (4)  | 120.49 (3)  | 121.191 (14)            | 121.64 (4)  | 123.87 (3)   |
| Cu1—I1—Cu1 <sup>iv</sup>                 | 180.00 (3)  | 180.0       | 180.0                   | 180.0       | 180.00 (2)   |
| Cu1 <sup>iii</sup> —I1—Cu1 <sup>iv</sup> | 60.97 (4)   | 59.51 (3)   | 58.809 (14)             | 58.36 (4)   | 56.13 (3)    |
| Cu1 <sup>i</sup> —I1—Cu1 <sup>v</sup>    | 119.03 (4)  | 120.49 (3)  | 121.191 (14)            | 121.64 (4)  | 123.87 (3)   |
| Cu1 <sup>ii</sup> —I1—Cu1 <sup>v</sup>   | 180.0       | 180.00 (2)  | 180.0                   | 180.00 (3)  | 180.00 (2)   |
| Cu1—I1—Cu1 <sup>v</sup>                  | 119.03 (4)  | 120.49 (3)  | 121.191 (14)            | 121.64 (4)  | 123.87 (3)   |
| Cu1 <sup>iii</sup> —I1—Cu1 <sup>v</sup>  | 60.97 (4)   | 59.51 (3)   | 58.809 (14)             | 58.36 (4)   | 56.13 (3)    |



|                                         |             |             |              |            |             |
|-----------------------------------------|-------------|-------------|--------------|------------|-------------|
| Cu1 <sup>iv</sup> —I1—Cu1 <sup>v</sup>  | 60.97 (4)   | 59.51 (3)   | 58.809 (14)  | 58.36 (4)  | 56.13 (3)   |
| Cu1—I2—Cu1 <sup>ii</sup>                | 67.64 (5)   | 65.93 (4)   | 65.10 (2)    | 64.78 (6)  | 62.59 (5)   |
| N1—Cu1—I2                               | 108.99 (17) | 107.93 (14) | 107.63 (7)   | 107.6 (2)  | 108.01 (16) |
| N1—Cu1—I2 <sup>i</sup>                  | 105.92 (17) | 105.86 (14) | 105.47 (7)   | 106.1 (2)  | 103.37 (16) |
| I2—Cu1—I2 <sup>i</sup>                  | 125.97 (5)  | 125.26 (4)  | 125.045 (19) | 123.68 (6) | 125.00 (4)  |
| N1—Cu1—Cu1 <sup>i</sup>                 | 143.06 (17) | 142.75 (14) | 141.14 (7)   | 141.4 (2)  | 139.76 (16) |
| I2—Cu1—Cu1 <sup>i</sup>                 | 109.55 (4)  | 110.20 (3)  | 110.355 (16) | 110.26 (5) | 111.50 (4)  |
| I2 <sup>i</sup> —Cu1—Cu1 <sup>i</sup>   | 56.15 (4)   | 56.93 (4)   | 57.539 (17)  | 57.58 (5)  | 58.78 (4)   |
| N1—Cu1—Cu1 <sup>ii</sup>                | 143.06 (17) | 141.07 (14) | 142.92 (7)   | 142.7 (2)  | 143.72 (16) |
| I2—Cu1—Cu1 <sup>ii</sup>                | 56.15 (4)   | 57.14 (3)   | 57.357 (17)  | 57.63 (5)  | 58.63 (4)   |
| I2 <sup>i</sup> —Cu1—Cu1 <sup>ii</sup>  | 109.55 (4)  | 110.03 (3)  | 110.513 (15) | 110.22 (4) | 111.63 (4)  |
| Cu1 <sup>i</sup> —Cu1—Cu1 <sup>ii</sup> | 60.0        | 60.0        | 60.0         | 60.000 (1) | 60.0        |
| N1—Cu1—I1                               | 100.93 (17) | 100.32 (14) | 100.08 (7)   | 99.8 (2)   | 97.99 (15)  |
| I2—Cu1—I1                               | 106.16 (4)  | 107.45 (3)  | 107.982 (15) | 108.55 (5) | 109.51 (4)  |
| I2 <sup>i</sup> —Cu1—I1                 | 106.12 (4)  | 107.28 (3)  | 107.833 (16) | 108.50 (5) | 109.39 (3)  |
| Cu1 <sup>i</sup> —Cu1—I1                | 59.515 (17) | 60.244 (14) | 60.597 (7)   | 60.82 (2)  | 61.935 (16) |
| Cu1 <sup>ii</sup> —Cu1—I1               | 59.515 (18) | 60.245 (14) | 60.596 (7)   | 60.82 (2)  | 61.935 (16) |

Symmetry codes: (i) 1-x+y, 2-x, z; (ii) 2-y, 1+x-y, z; (iii) -y, 1+x-y, z; (iv) x, 2+y, 2+z; (v) 2-y, x-y, 1+z; (vi) 1-y, 1+x-y, z; (vii) -x+y, 1-x, z; (viii) x, y, 1+z.

**Table S4.** Selected bond lengths (Å) and bond angles (°) for compound **2**.

| Atom | Atom             | Length/Å   | Atom | Atom | Length/Å |
|------|------------------|------------|------|------|----------|
| I1   | Cu1              | 2.6145(6)  | N6   | C17  | 1.342(5) |
| I1   | Cu1 <sup>1</sup> | 2.6338(6)  | N6   | C21  | 1.332(5) |
| Cu1  | I1 <sup>1</sup>  | 2.6338(6)  | N4   | C16  | 1.340(5) |
| Cu1  | Cu1 <sup>1</sup> | 2.6355(10) | N4   | C13  | 1.337(5) |
| Cu1  | N1               | 2.061(3)   | C12  | C14  | 1.398(5) |
| Cu1  | N6 <sup>2</sup>  | 2.068(3)   | C12  | C13  | 1.394(5) |
| P1   | O1               | 1.478(3)   | C18  | C17  | 1.404(5) |
| P1   | N2               | 1.661(3)   | C18  | C19  | 1.394(6) |
| P1   | N5               | 1.650(4)   | C11  | C10  | 1.380(6) |

|                 |                  |                  |                |             |             |                  |                |
|-----------------|------------------|------------------|----------------|-------------|-------------|------------------|----------------|
| P1              | N3               | 1.644(3)         | C8             | C7          | 1.395(5)    |                  |                |
| N1              | C11              | 1.346(5)         | C8             | C9          | 1.394(5)    |                  |                |
| N1              | C7               | 1.339(5)         | C16            | C15         | 1.390(6)    |                  |                |
| N2              | C8               | 1.395(5)         | C15            | C14         | 1.389(5)    |                  |                |
| N5              | C18              | 1.399(5)         | C19            | C20         | 1.381(5)    |                  |                |
| N3              | C12              | 1.402(4)         | C9             | C10         | 1.384(7)    |                  |                |
| N6              | Cu1 <sup>2</sup> | 2.068(3)         | C20            | C21         | 1.393(5)    |                  |                |
| <i>Atom</i>     | <i>Atom</i>      | <i>Atom</i>      | <i>Angle/°</i> | <i>Atom</i> | <i>Atom</i> | <i>Atom</i>      | <i>Angle/°</i> |
| Cu1             | I1               | Cu1 <sup>1</sup> | 60.28(2)       | C21         | N6          | Cu1 <sup>2</sup> | 119.2(2)       |
| I1              | Cu1              | I1 <sup>1</sup>  | 119.72(2)      | C21         | N6          | C17              | 118.8(3)       |
| I1 <sup>1</sup> | Cu1              | Cu1 <sup>1</sup> | 59.50(2)       | C13         | N4          | C16              | 118.3(3)       |
| I1              | Cu1              | Cu1 <sup>1</sup> | 60.22(2)       | C14         | C12         | N3               | 119.1(3)       |
| N1              | Cu1              | I1 <sup>1</sup>  | 106.76(9)      | C13         | C12         | N3               | 123.0(3)       |
| N1              | Cu1              | I1               | 109.37(10)     | C13         | C12         | C14              | 117.9(3)       |
| N1              | Cu1              | Cu1 <sup>1</sup> | 128.11(8)      | N5          | C18         | C17              | 121.5(3)       |
| N1              | Cu1              | N6 <sup>2</sup>  | 103.91(12)     | C19         | C18         | N5               | 120.0(3)       |
| N6 <sup>2</sup> | Cu1              | I1               | 108.60(9)      | C19         | C18         | C17              | 118.5(3)       |
| N6 <sup>2</sup> | Cu1              | I1 <sup>1</sup>  | 107.36(10)     | N1          | C11         | C10              | 121.9(4)       |
| N6 <sup>2</sup> | Cu1              | Cu1 <sup>1</sup> | 127.92(9)      | N2          | C8          | C7               | 118.8(3)       |
| O1              | P1               | N2               | 114.23(16)     | C9          | C8          | N2               | 123.7(3)       |
| O1              | P1               | N5               | 116.65(17)     | C9          | C8          | C7               | 117.4(4)       |
| O1              | P1               | N3               | 109.46(15)     | N6          | C17         | C18              | 122.1(4)       |
| N5              | P1               | N2               | 102.16(16)     | N4          | C16         | C15              | 122.0(3)       |
| N3              | P1               | N2               | 108.82(16)     | N1          | C7          | C8               | 123.6(3)       |
| N3              | P1               | N5               | 104.83(16)     | C14         | C15         | C16              | 119.9(3)       |
| C11             | N1               | Cu1              | 120.0(3)       | C20         | C19         | C18              | 118.8(3)       |
| C7              | N1               | Cu1              | 120.4(2)       | C10         | C9          | C8               | 118.9(4)       |
| C7              | N1               | C11              | 118.1(3)       | C15         | C14         | C12              | 118.3(3)       |
| C8              | N2               | P1               | 126.0(3)       | N4          | C13         | C12              | 123.7(3)       |
| C18             | N5               | P1               | 129.1(3)       | C19         | C20         | C21              | 119.2(4)       |
| C12             | N3               | P1               | 129.0(3)       | C11         | C10         | C9               | 119.9(4)       |
| C17             | N6               | Cu1 <sup>2</sup> | 121.8(3)       | N6          | C21         | C20              | 122.6(4)       |

Symmetry codes: (1) -X,-Y,-Z; (2) -X,1-Y,1-Z

## References:

1. Li, N.; Jiang, F.; Chen, L.; Li, X.; Chen, Q.; Hong, M. From discrete octahedral nanocages to 1D coordination polymer: coordination-driven a single-crystal-to-single-crystal transformation via anion exchange. *Chem. Commun.* **2011**, *47*, 2327-2329.
2. <http://www.ccdc.cam.ac.uk/mercury/>
3. Sheldrick, G. M. *SHELX-97: Programs for crystal structure analysis*. Göttingen, Germany (1997).
4. Vandersluis, P.; Spek, A. L. Bypass - an effective method for the refinement of crystal-structures containing disordered solvent regions. *Acta Crystallogr., Sect. A* **1990**, *46*, 194-201.
5. (a) Segall, M.; Linda, P.; Probert, M.; Pickard, C.; Hasnip, P.; Clark, S.; Payne, M. Materials Studio CASTEP Version 2.2 (2002). (b) Adamo, C.; Barone, V. Physically motivated density functionals with improved performances: The modified Perdew-Burke-Ernzerhof model. *J. Chem. Phys.* **2002**, *116*, 5933-5940.
6. Perdew, J. P.; Burke, K.; Ernzerhof, M. Generalized gradient approximation made simple. *Phys. Rev. Lett.* **1996**, *77*, 3865-3868.
7. Hamann, D. R.; Schlüter, M.; Chiang, C. Norm-conserving pseudopotentials. *Phys. Rev. Lett.* **1979**, *43*, 1494-1497.
8. Ohno, Y. Color rendering and luminous efficacy of white LED spectra. *Proc. SPIE* **2004**, 5530, 88-98.
